# Supplementary material for: Reversible swelling transitions in stimuli-responsive layer-by-layer films containing block copolymer micelles
Source: Royal Society of Chemistry journal article supplement (doi:10.1039/c2sc20836a), 2012-09-06
Supplement: c2sc20836a.pdf [file c2sc20836a.pdf]

## Supporting Information

### Reversible swelling transitions in stimuli-responsive layer-by-layer films containing block copolymer micelles

Julia Gensel,<sup>a</sup> Inna Dewald,<sup>a</sup> Johann Erath,<sup>a</sup> Eva Betthausen,<sup>b</sup> Axel. H. E. Müller<sup>b</sup> and Andreas Fery\*<sup>a</sup>

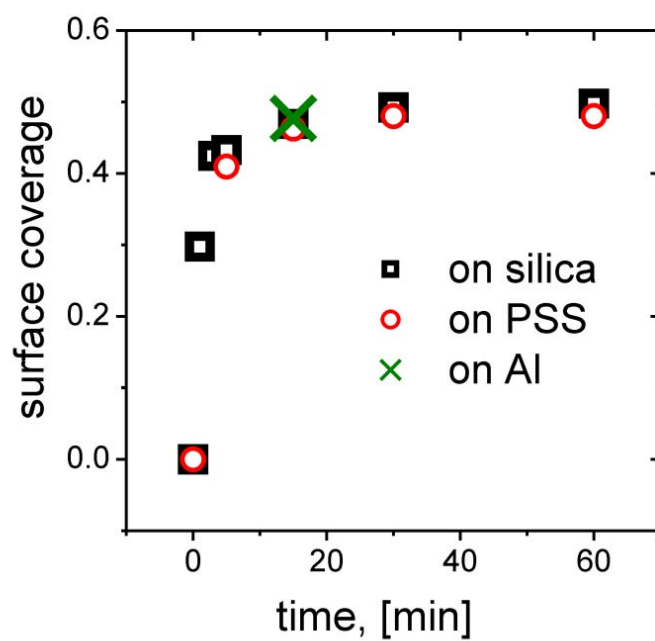

Figure S1: Adsorption kinetics of BMAADq micelles onto different substrates studied by AFM

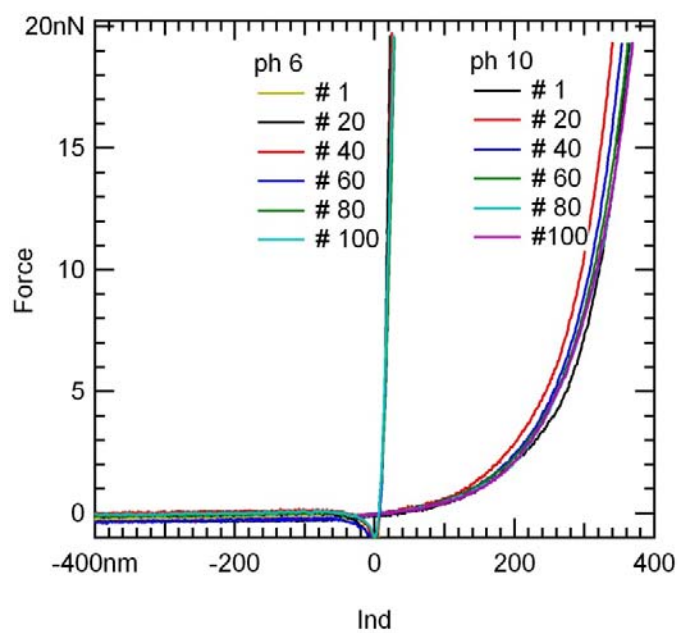

Figure S2: Force-indentation measurements on the same spot of the sample show that the film is not plastically deformed. Legend indicates the number of measurements.

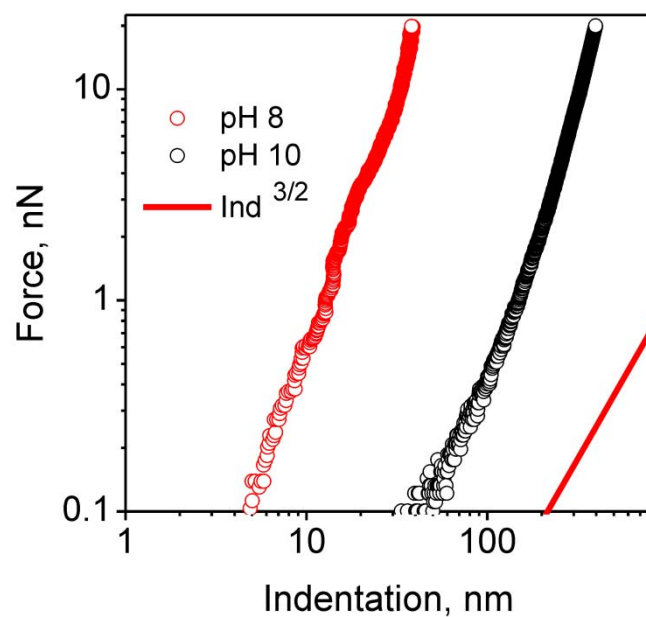

**Figure S3:** log-log plot of the force–indentation data for different swelling states of a (BMAADq/PSS)<sub>3</sub> film. The force is proportional to the 3/2 power of the indentation confirming the validity of the Hertzian model. For comparison, a line corresponding to the 3/2 power law relationship is plotted (solid line).

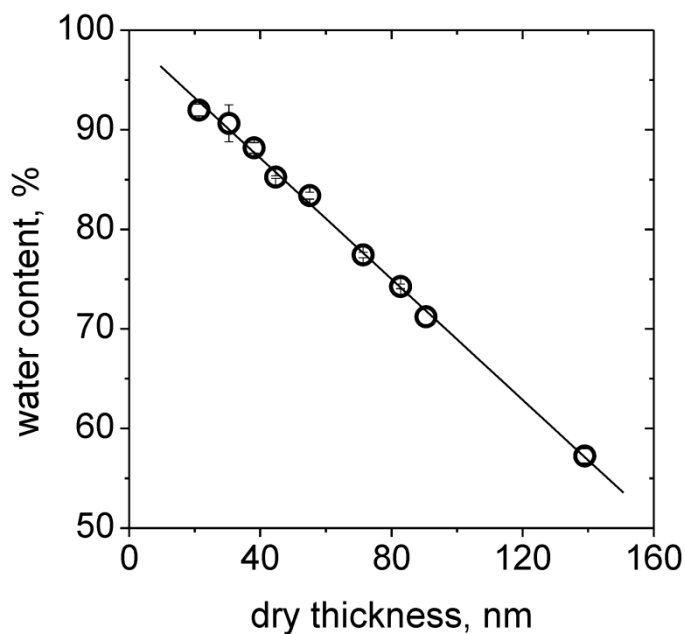

**Figure S4:** Water content vs. the dry thickness of (BMAADq/PSS)<sub>x</sub> films.
